# Supplementary material for: MYC associated zinc finger protein promotes the invasion and metastasis of hepatocellular carcinoma by inducing epithelial mesenchymal transition
Source: PubMed Central journal article supplement (PMC5349923; doi:10.18632/oncotarget.13416), 2016-11-16
Supplement: oncotarget-07-86420-s001.pdf [file oncotarget-07-86420-s001.pdf]

# MYC associated zinc finger protein promotes the invasion and metastasis of hepatocellular carcinoma by inducing epithelial mesenchymal transition

## Supplementary Materials

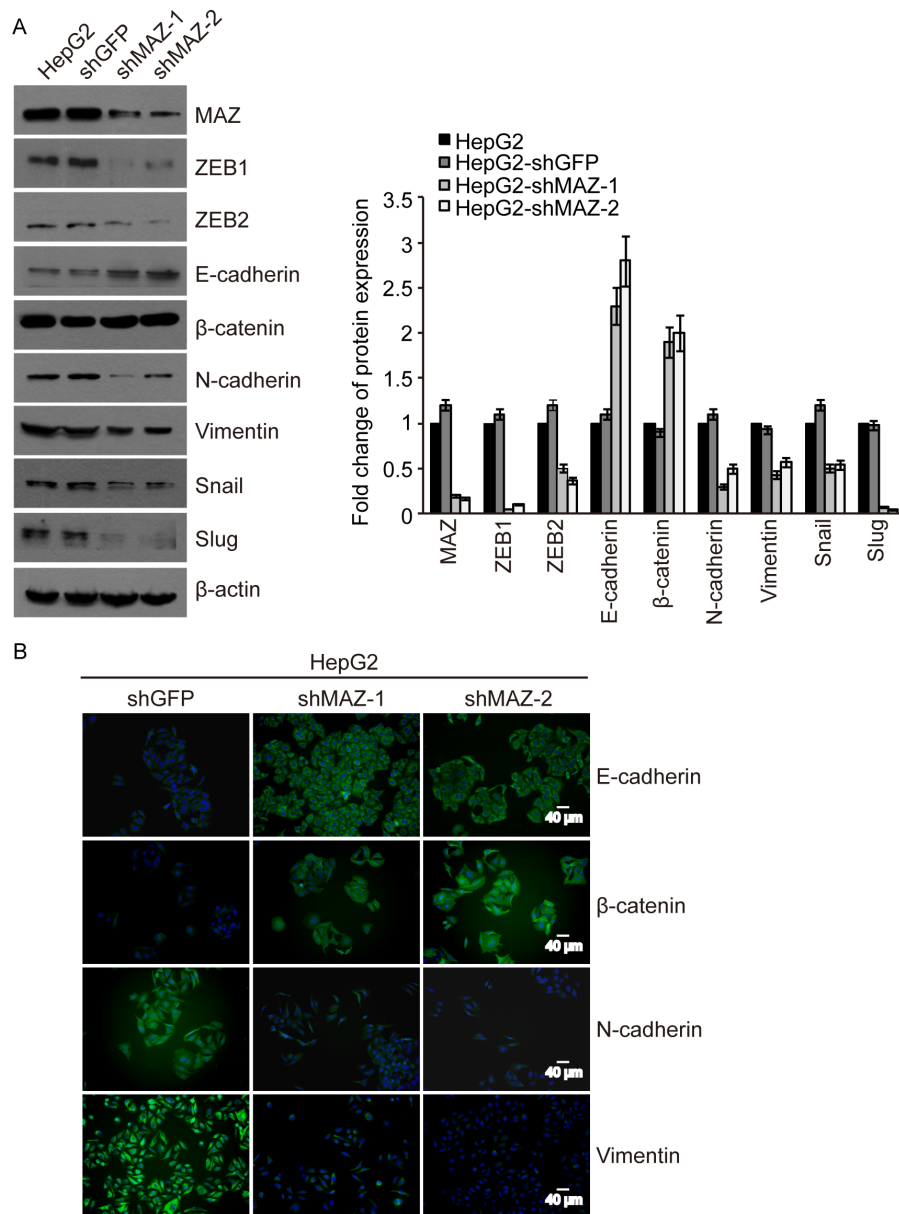

**Supplementary Figure S1:** (A and B) protein expression of EMT markers indicated was detected in HepG2 cells by Western blot and immunofluorescence (200× magnification).

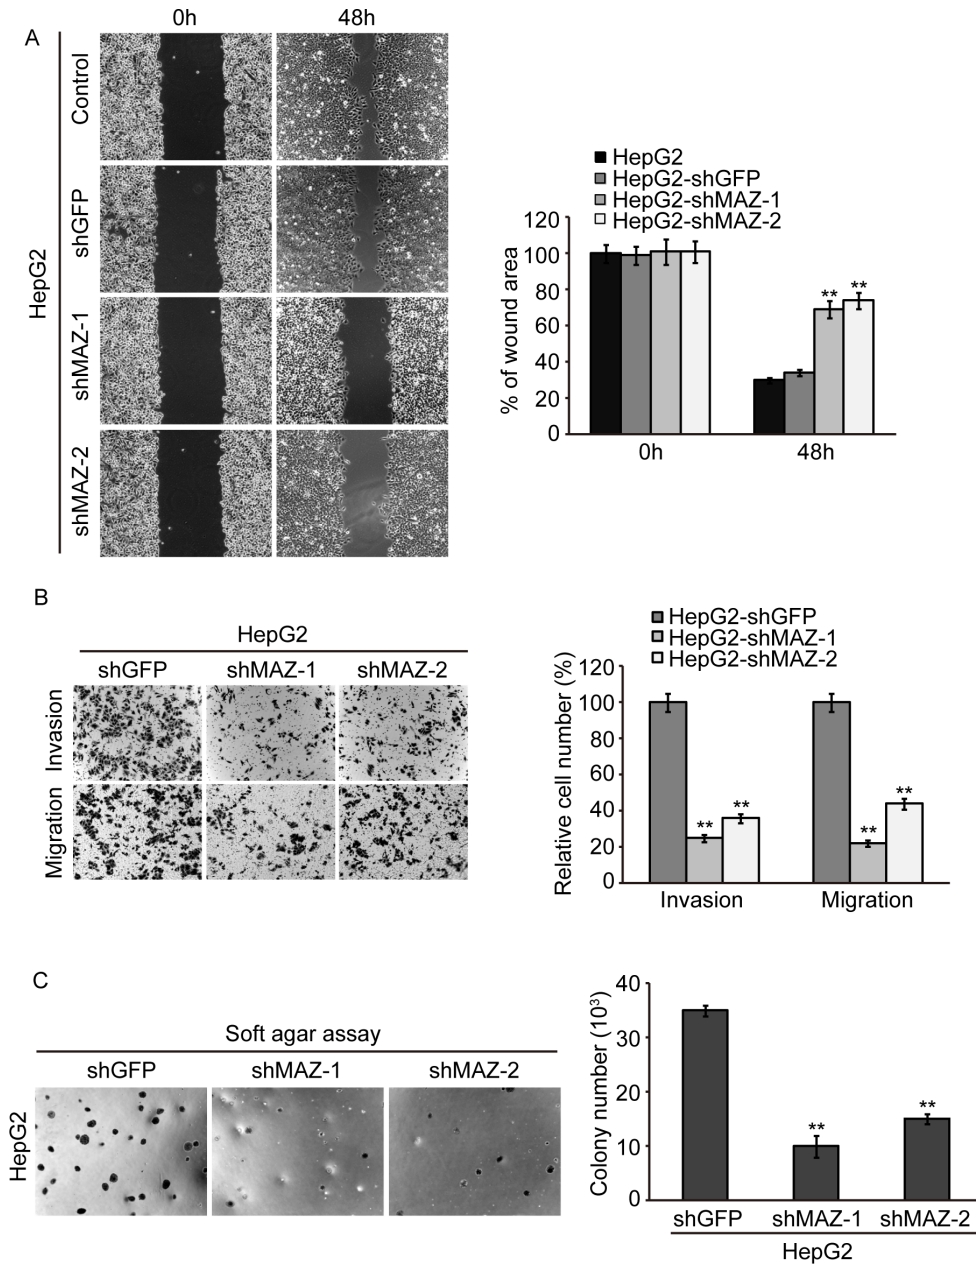

**Supplementary Figure S2:** (A and B) invasion and migration ability was analyzed by wound healing and Transwell assay in HepG2 cells. (C) representative colony pictures and colony number count in HepG2 cells by soft agar assay.  $**P < 0.01$  is based on the Student *t* test compared to HepG2-shGFP cells. All results are from three independent experiments.
